# Supplementary material for: Zinc Oxide Nanoparticles and Zinc Sulfate Alleviate Boron Toxicity in Cotton (Gossypium hirsutum L.)
Source: MDPI journal article supplement (doi:10.3390/plants13091184), 2024-04-24
Supplement: s1 [file s1]

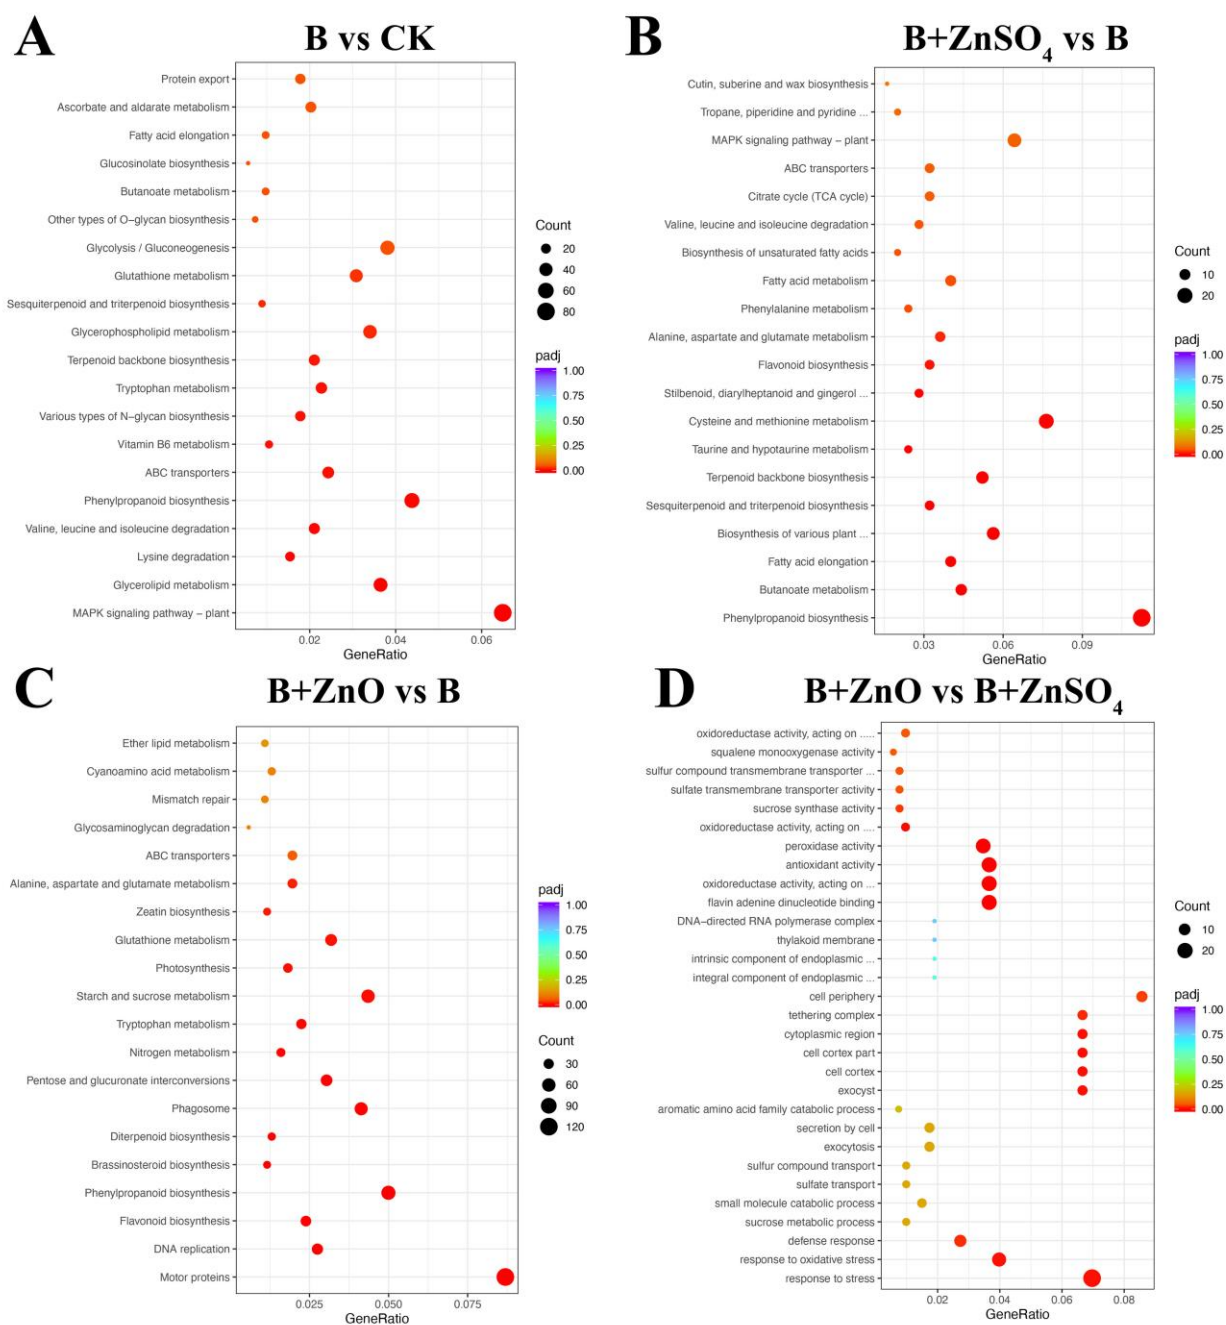

**Figure S2.** The upregulated KEGG pathway enrichment analysis of differentially expressed genes in (A) B vs CK (B) B+ZnSO<sub>4</sub> vs B (C) B+ZnO vs B (D) B+ZnO vs B+ZnSO<sub>4</sub>.

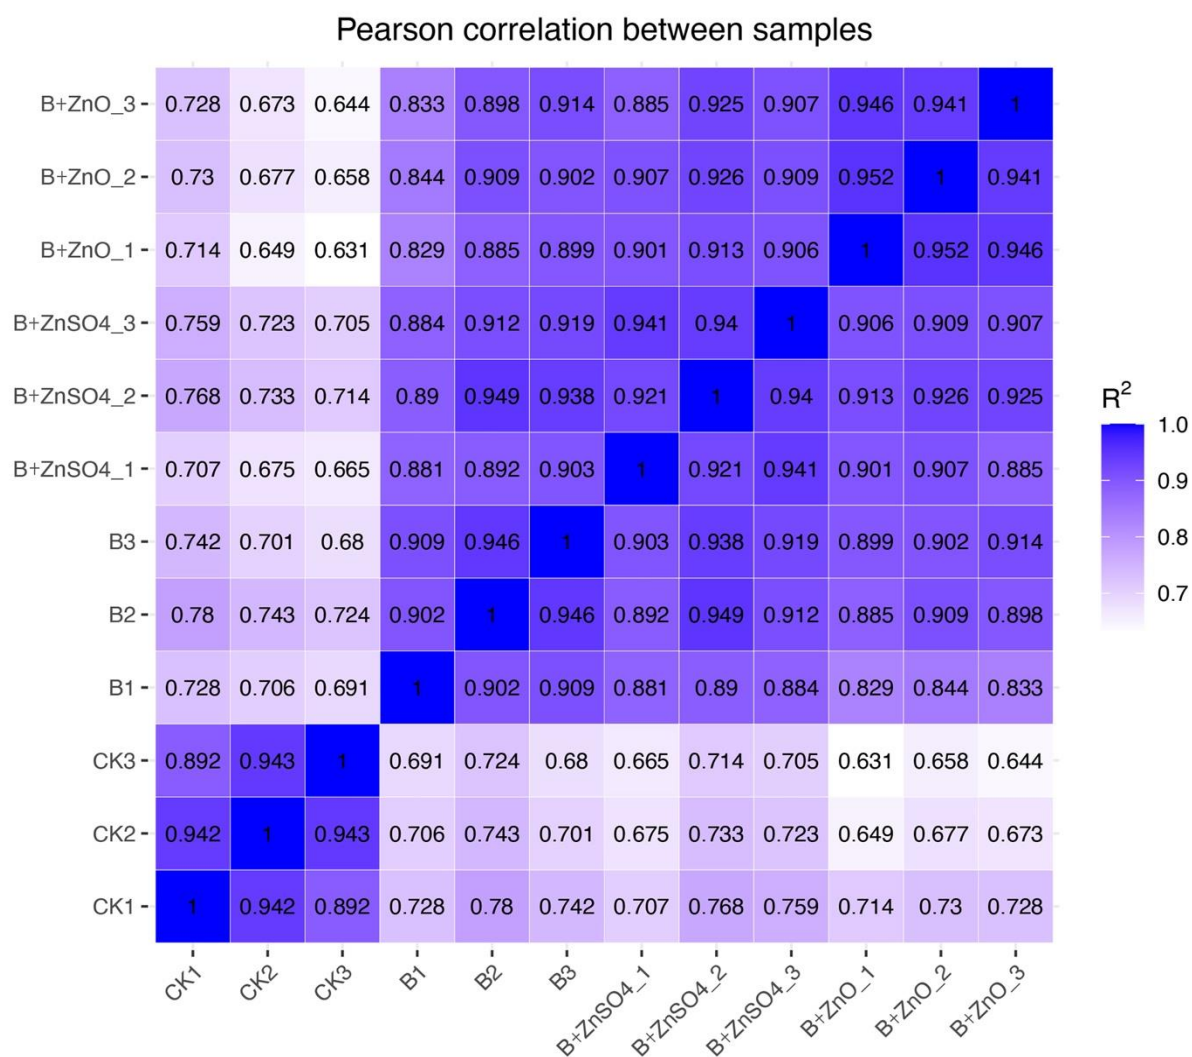

**Figure S3.** Heat map of inter-sample correlations. The horizontal and vertical coordinates in the figure are the squares of the correlation coefficients of each sample.
